# Supplementary material
Source: publisher figshare collection journal article supplement (https://gsapubs.figshare.com/ndownloader/files/22410006)
Supplement: Supplementary file 1 [file 22410006]

## Sheet: Table
Run_ID	Pwr_Achieved	Ar40_	Ar40_Er	Ar39_DecayCor	Ar39_DecayCorEr	Ar38_	Ar38_Er	Ar37_DecayCor	Ar37_DecayCorEr	Ar36_	Ar36_Er	Ar40_Bkgd	Ar40_BkgdEr	Ar39_Bkgd	Ar39_BkgdEr	Ar38_Bkgd	Ar38_BkgdEr	Ar37_Bkgd	Ar37_BkgdEr	Ar36_Bkgd	Ar36_BkgdEr	Ar39_Moles	Ar39_CumPct	Ar36_Over_Ar39	Ar36_Over_Ar39_Er	PctAr36Ca	Ar37_Over_Ar39	Ar37_Over_Ar39_Er	Ca_Over_K	Ca_Over_K_Er	Cl_Over_K	Cl_Over_K_Er	Ar38_Over_Ar39	Ar38_Over_Ar39_Er	Ar40_Over_Ar39	Ar40_Over_Ar39_Er	Ar40Rad_Over_Ar39	Ar40Rad_Over_Ar39_Er	PctAr40Rad	Age	Age_Er	Age_Er_with_J_er	Isoch_36_Over_40	Pct_i36_Over_40_Er	Isoch_39_Over_40	Pct_i39_Over_40_Er	Correl_36_Over_39
Use auto decimal alignment:		TRUE	TRUE	TRUE	TRUE	TRUE	TRUE	TRUE	TRUE	TRUE	TRUE	TRUE	TRUE	TRUE	TRUE	TRUE	TRUE	TRUE	TRUE	TRUE	TRUE								TRUE	TRUE	TRUE	TRUE								TRUE	TRUE
	1	1	1	1	1	1	1	1	1	1	1	1	1	1	1	1	1	1	1	1	1	100000000000000		100000	100000	1	1	1	1	1	1	1	1	1	1	1	1	1	1	1	1	1	1	1	1	1	1
Supplemental Table 4. 40Ar/39Ar Thermochonology Data
		Isotopic Abundances										Background Isotopic Abundances										Derived Results																					Inverse Isochron Data
Lab ID#	Watts	40Ar		39Ar		38Ar		37Ar		36Ar		40Ar Bkgd		39Ar Bkgd		38Ar Bkgd		37Ar Bkgd		36Ar Bkgd		39Ar Mol	39Ar %	36Ar/39Ar	±1s	%(36Ar)Ca	37Ar/39Ar	±1s	Ca/K		Cl/K		38Ar/39Ar	±1s	40Ar/39Ar	±1s	40Ar*/39Ar		%40Ar*	Age (Ma)		w/±J	36Ar/40Ar		39Ar/40Ar		36Ar/39Ar
		±1s		±1s		±1s		±1s		±1s		±1s		±1s		±1s		±1s		±1s		¥ 10-14	of total	( X 10-5)					±1s		±1s						±1s			±1s		±1s	±%1s		±%1s		Er. Corr.
TK15, GSC irradiation #67, tube A, J = 0.003539 ± 0.00001 (1σ)
Aliquot 1
3164-01A	0.1	113935	69.721	1301.31	6.10401	71.7772	1.5021	-1.23004	4.95245	299.093	3.42879	8465	24	17.9	0.85	17.206	0.55	74.86	1.2	69.54	1.2	0.00458793	0.772546	22984.1	284.69	-0.0001147	-0.0009452	0.0038058	-0.0018527	0.0074593	0.0067173	7.62804e-07	0.0551579	0.0011829	87.5543	0.41417	18.93	0.793497	21.6216	116.978	4.74784	4.75862	0.0026252	1.14805	0.0114219	0.473059	0.0068959
3164-01B	0.2	77123.1	52.397	13686	18.9082	188.917	2.51659	53.9678	5.73549	141.222	2.55169	8465	24	17.9	0.85	17.206	0.55	74.86	1.2	69.54	1.2	0.048252	8.12498	1031.88	18.7	0.0106619	0.0039433	0.0004191	0.0077288	0.0008215	0.0068711	8.40043e-08	0.0138037	0.0001849	5.63518	0.0086758	2.55178	0.0559652	45.3071	16.2182	0.354099	0.357027	0.0018319	1.80838	0.177551	0.154041	0.016595
3164-01C	0.3	146157	88.9023	60414.8	47.8599	725.007	6.49045	75.8944	5.24164	78.261	2.30827	8465	24	17.9	0.85	17.206	0.55	74.86	1.2	69.54	1.2	0.213001	35.8665	129.54	3.82	0.0270563	0.0012562	8.68e-05	0.0024622	0.0001701	0.0062642	1.7391e-08	0.0120005	0.0001079	2.41923	0.0024163	2.02961	0.0118801	83.9991	12.9113	0.0753048	0.083621	0.0005359	2.95117	0.413868	0.100001	0.012578
3164-01D	0.35	30131.6	41.1856	17652.9	21.431	219.349	3.03339	35.0183	6.00409	6.47292	2.20608	8504.2	25	19.35	1	18.66	0.58	76.62	1.2	75.02	1.4	0.0622378	10.48	36.67	12.5	0.150938	0.0019837	0.0003401	0.0038881	0.0006667	0.0098237	6.81732e-08	0.0124256	0.0001725	1.70689	0.0031205	1.59464	0.0375184	93.5876	10.152	0.238184	0.239895	0.0002148	34.1497	0.58689	0.183137	0.0030002
3164-01E	0.4	11799.2	36.3847	6053.25	12.6324	75.2314	1.52682	1.60906	5.22325	1.4224	2.59347	8504.2	25	19.35	1	18.66	0.58	76.62	1.2	75.02	1.4	0.0213416	3.59364	23.5	42.84	0.0315614	0.0002658	0.0008629	0.000521	0.0016913	0.0099861	1.72951e-07	0.0124283	0.0002536	1.94923	0.0072578	1.87614	0.128144	96.399	11.9382	0.812707	0.813403	0.0001206	182.523	0.513814	0.372919	0.001402
3164-01F	0.5	41631.1	153.116	20750.2	22.6889	247.591	3.02144	4.66974	5.49502	8.53462	2.39961	8504.2	25	19.35	1	18.66	0.58	76.62	1.2	75.02	1.4	0.0731578	12.3188	41.13	11.56	0.0152655	0.000225	0.0002648	0.0004411	0.000519	0.0068461	5.30784e-08	0.011932	0.0001462	2.0063	0.0076982	1.88055	0.035455	93.8728	11.9662	0.224858	0.227369	0.0002052	28.1313	0.499177	0.384277	0.0125526
3164-01G	0.6	29714.1	38.9799	11196.7	17.6777	134.16	2.42783	31.9803	5.62761	5.86625	2.18469	8434	23	14.12	1.3	19.645	0.74	75.94	1.1	75.9	1.2	0.0394754	6.64712	52.39	19.51	0.152099	0.0028562	0.0005026	0.0055982	0.0009852	0.0070179	1.00745e-07	0.0119821	0.0002177	2.65383	0.0054476	2.49469	0.0585466	94.1094	15.8569	0.370506	0.373182	0.0001973	37.3077	0.377239	0.205504	0.0022512
3164-01H	0.8	83716.8	67.013	14276	20.1903	172.541	2.90735	142.987	6.24173	10.9568	2.18362	8434	23	14.12	1.3	19.645	0.74	75.94	1.1	75.9	1.2	0.0503319	8.47521	76.75	15.3	0.364098	0.010016	0.0004374	0.0196313	0.0008574	0.0073633	8.76796e-08	0.0120861	0.0002044	5.86418	0.0095299	5.63295	0.0466634	96.1053	35.6085	0.292089	0.308616	0.0001304	20.006	0.170613	0.162594	0.0019726
3164-01I	1.5	38748.7	50.8209	9773.31	20.1903	118.641	2.16488	75.0193	5.89526	0.830426	2.27975	8434	23	14.12	1.3	19.645	0.74	75.94	1.1	75.9	1.2	0.0344572	5.80212	8.5	23.33	2.52044	0.0076759	0.0006034	0.0150448	0.0011827	0.0084413	1.20944e-07	0.0121393	0.0002229	3.96475	0.0097018	3.93708	0.0703561	99.3769	24.9619	0.443	0.448505	2.09e-05	282.116	0.252413	0.244889	0.0002495
3164-01J	6	28309.5	43.1478	13339.3	18.9338	163.424	2.31132	12.8883	5.31342	10.1893	2.18031	8434	23	14.12	1.3	19.645	0.74	75.94	1.1	75.9	1.2	0.0470296	7.91915	76.39	16.35	0.0352903	0.0009662	0.0003983	0.0018937	0.0007807	0.0083456	7.98389e-08	0.0122513	0.0001741	2.12226	0.0044201	1.89132	0.0490453	89.2446	12.0345	0.311037	0.312878	0.0003602	21.4105	0.471863	0.208567	0.0052204
Integrated age: 16.5 ± 0.4 Ma
Aliquot 2
3164-02A	0.1	44272	85.2287	1286.33	5.3179	46.6876	2.04578	32.1779	11.0969	140.062	2.6643	7547	19	21.85	1.7	31.567	0.83	78.37	1.1	70.51	1.1	0.00453514	0.878976	10888.5	211.96	0.0064097	0.0250153	0.0086274	0.04903	0.0169098	0.0300718	1.72923e-06	0.0362952	0.0015975	34.4173	0.156957	1.90795	0.622017	5.54395	12.1399	3.94449	3.94464	0.0031637	1.91215	0.0290572	0.456088	0.0425074
3164-02B	0.2	55599.1	51.1107	13813.3	18.9081	189.314	2.70441	80.3177	10.5683	119.564	2.69346	7392.1	18	16.488	0.72	31.818	0.83	80.29	1.1	65.76	1.3	0.0487008	9.43893	865.57	19.53	0.018742	0.0058145	0.0007651	0.0113964	0.0014996	0.0081466	1.53356e-07	0.0137052	0.0001967	4.02504	0.0066367	1.43835	0.058423	35.7617	9.15954	0.371099	0.371996	0.0021516	2.25518	0.248629	0.16501	0.0227553
3164-02C	0.3	62885.6	177.155	39496.8	32.7582	466.38	3.71957	117.948	12.3038	22.35	2.23581	7392.1	18	16.488	0.72	31.818	0.83	80.29	1.1	65.76	1.3	0.139252	26.989	56.59	5.66	0.147238	0.0029863	0.0003115	0.0058531	0.0006106	0.0059388	6.244e-08	0.011808	9.47e-05	1.59217	0.0046757	1.42053	0.0177038	89.388	9.04631	0.11246	0.115315	0.0003554	10.0259	0.629259	0.29422	0.0270102
3164-02D	0.35	61149.6	277.531	24735.5	21.4258	307.694	3.52981	83.6888	10.612	73.0413	2.45396	7392.1	18	16.488	0.72	31.818	0.83	80.29	1.1	65.76	1.3	0.0872086	16.9023	295.29	9.92	0.0319671	0.0033833	0.000429	0.0066314	0.0008409	0.0070143	8.59921e-08	0.0124393	0.0001431	2.47214	0.0114224	1.58787	0.0318028	64.3086	10.109	0.201903	0.203903	0.0011955	3.39169	0.404999	0.462608	0.131611
3164-02E	0.4	24901.2	39.5778	14960.5	17.6495	176.293	2.39895	73.6644	11.1958	13.4025	1.95529	7392.1	18	16.488	0.72	31.818	0.83	80.29	1.1	65.76	1.3	0.0527452	10.2228	89.59	13.07	0.153347	0.0049239	0.0007484	0.0096509	0.0014668	0.0054273	1.50001e-07	0.0117839	0.000161	1.66447	0.0032946	1.39447	0.0392268	83.9294	8.88075	0.249205	0.250459	0.0005383	14.6155	0.601875	0.198296	0.0087537
3164-02F	0.5	16966.4	34.7562	9263.31	13.9078	111.454	2.22356	70.2394	12.4921	6.88852	1.87425	7394.9	21	14.68	1.2	34.153	0.75	86.49	1.1	70.26	1.3	0.0326591	6.32982	74.36	20.23	0.284485	0.0075825	0.0013486	0.0148618	0.0026433	0.0070672	2.70307e-07	0.0120317	0.0002407	1.83157	0.0046518	1.60725	0.0606269	87.8963	10.232	0.384869	0.385948	0.0004054	27.2956	0.546874	0.254399	0.0060669
3164-02G	0.6	10022.2	36.7938	4050.55	10.2734	41.7636	1.81088	261.187	15.1147	6.9666	2.04885	7394.9	21	14.68	1.2	34.153	0.75	86.49	1.1	70.26	1.3	0.0142808	2.76783	171.99	50.58	1.04601	0.0644819	0.0037351	0.126384	0.0073208	-0.0042219	7.48639e-07	0.0103106	0.0004478	2.47427	0.0110406	1.9632	0.151414	79.4372	12.4902	0.959996	0.96064	0.0006887	29.7216	0.404632	0.446763	0.0101792
3164-02H	0.8	20918.5	45.4283	12519.7	18.9325	141.989	2.9186	211.801	12.6011	6.92593	2.13581	7394.9	21	14.68	1.2	34.153	0.75	86.49	1.1	70.26	1.3	0.04414	8.55498	55.32	17.06	0.853207	0.0169174	0.0010068	0.0331582	0.0019734	0.0031868	2.01803e-07	0.0113412	0.0002338	1.67085	0.0044216	1.50414	0.0511784	90.1834	9.57736	0.325007	0.326126	0.0003288	31.1106	0.599568	0.265109	0.0057423
3164-02I	1.5	17847.8	35.6901	10491.3	18.914	131.913	2.40409	88.235	11.2102	8.33278	2.06933	7244.3	19	13.774	0.86	29.921	0.69	81.83	1.1	67.39	1.2	0.0369887	7.16895	79.43	19.72	0.295431	0.0084103	0.0010686	0.0164841	0.0020945	0.0102236	2.14189e-07	0.0125735	0.0002303	1.7012	0.0045803	1.46186	0.0591015	86.0829	9.30888	0.375378	0.376294	0.0004661	24.9186	0.588857	0.269715	0.0059757
3164-02J	6	36123.7	38.939	15726.7	21.4309	194.971	2.69561	55.8968	11.7323	23.922	2.17025	7244.3	19	13.774	0.86	29.921	0.69	81.83	1.1	67.39	1.2	0.0554468	10.7464	152.11	13.8	0.065192	0.0035543	0.000746	0.0069663	0.0014622	0.0083665	1.49529e-07	0.0123975	0.0001722	2.29697	0.003991	1.8402	0.0414285	80.219	11.7103	0.262779	0.264841	0.0006625	9.0806	0.435925	0.173978	0.0073803
Isochron age: 9.4 ± 0.3 Ma (MSWD = 13, steps A-J, n = 10, 40Ar/36Ar intercept = 310 ± 30)
Integrated age: 9.8 ± 0.3 Ma
Aliquot 3
3164-03A	0.1	148514	69.8353	765.48	3.94818	33.4979	1.66283	-25.7842	15.6145	98.232	2.63215	14961.4	16	12.014	0.58	31.992	0.92	71.96	1	93.54	1.2	0.00269881	0.590161	12832.7	350.17	-0.0073233	-0.0336837	0.020399	-0.06602	0.0399821	0.0526015	4.08866e-06	0.0437607	0.002184	194.014	1.00483	155.692	1.30659	80.2508	791.765	5.37835	5.67506	0.0006615	2.6799	0.0051545	0.517915	0.0015932
3164-03B	0.2	66781.2	56.4455	3951.7	8.20904	53.8938	1.88327	928.577	19.7261	24.1166	2.3884	14961.4	16	12.014	0.58	31.992	0.92	71.96	1	93.54	1.2	0.0139323	3.04664	610.28	60.45	1.07425	0.234982	0.0050156	0.460564	0.0098306	0.0106381	1.0053e-06	0.0136381	0.0004774	16.8994	0.0379005	15.0964	0.183859	89.3328	93.8931	1.11428	1.14388	0.0003573	10.0125	0.0591749	0.224342	0.0031822
3164-03C	0.3	87531	105.702	42131.3	36.5379	498.284	3.99568	1819.71	25.0748	13.4453	2.28335	14961.4	16	12.014	0.58	31.992	0.92	71.96	1	93.54	1.2	0.14854	32.4819	31.91	5.42	3.77604	0.0431914	0.0005963	0.0846552	0.0011688	0.0063329	1.19526e-07	0.0118269	9.54e-05	2.07758	0.0030888	1.98302	0.0166894	95.584	12.6159	0.105807	0.111612	0.0001479	17.6633	0.482012	0.14889	0.0055641
3164-03D	0.35	23340.7	46.8748	9404.78	16.3873	119.632	2.16005	899.341	20.6557	5.27602	2.08483	14961.4	16	12.014	0.58	31.992	0.92	71.96	1	93.54	1.2	0.0331579	7.25079	56.1	22.17	4.75578	0.0956259	0.0022026	0.187427	0.0043171	0.0113688	4.41478e-07	0.0127203	0.0002307	2.48178	0.0065986	2.31953	0.0665919	93.5693	14.7481	0.421679	0.423717	0.0002154	41.5223	0.403397	0.266211	0.0036596
3164-03E	0.4	46274.1	46.0533	6716.02	12.6106	83.5813	2.20359	1017.01	20.3551	-0.727646	2.23826	15058.3	17	14.144	0.57	33.441	0.81	67.65	1.3	93.07	1.3	0.0236783	5.17784	-10.83	33.33	-38.9951	0.151431	0.0030441	0.296804	0.0059665	0.0104931	6.10148e-07	0.0124451	0.0003289	6.8901	0.0146424	6.93288	0.100701	100.654	43.7272	0.627508	0.639273	-2.19e-05	-220.762	0.145184	0.212623	0.0002113
3164-03F	0.5	180846	74.9661	16037.5	21.4237	194.692	2.91698	1545.8	24.4756	3.27926	2.14862	15058.3	17	14.144	0.57	33.441	0.81	67.65	1.3	93.07	1.3	0.0565427	12.3644	20.45	13.4	13.1517	0.096386	0.0015316	0.188917	0.0030019	0.0083246	3.06978e-07	0.0121398	0.0001826	11.2764	0.0157721	11.2212	0.043117	99.5305	70.2534	0.264757	0.328645	1.57e-05	75.5742	0.0886986	0.139914	0.0001626
3164-03G	0.6	10058.1	38.0032	2299.45	8.33402	24.7558	1.61474	161.042	16.437	-2.31258	2.1482	15058.3	17	14.144	0.57	33.441	0.81	67.65	1.3	93.07	1.3	0.00810704	1.7728	-100.57	93.42	-1.94288	0.0700349	0.0071527	0.137268	0.0140193	0.0015261	1.43365e-06	0.0107659	0.0007033	4.37411	0.0229014	4.67745	0.279968	107.003	29.6177	1.75828	1.76024	-0.0002346	-91.1213	0.228764	0.523937	0.0029955
3164-03H	0.8	51547.4	56.7371	23221.6	28.9803	272.282	3.55489	694.497	19.4857	8.84204	2.44594	15058.3	17	14.144	0.57	33.441	0.81	67.65	1.3	93.07	1.3	0.0818712	17.9032	38.08	10.53	2.1914	0.0299073	0.0008399	0.0586184	0.0016463	0.0056597	1.68354e-07	0.0117254	0.0001538	2.2198	0.0036938	2.10571	0.0317612	94.9869	13.3936	0.201272	0.204774	0.0001679	28.2993	0.451092	0.166629	0.0025782
3164-03I	1.5	72579.9	58.2484	9229.47	15.1325	115.949	2.28051	672.306	20.7383	0.726233	2.30826	14799.7	27	14.685	0.68	30.066	0.81	68.37	1.2	93.25	1.4	0.0325398	7.11563	7.87	25.01	25.8283	0.0728435	0.0022501	0.142773	0.0044103	0.0109709	4.51004e-07	0.0125629	0.0002479	7.86394	0.0143554	7.84402	0.0761016	99.7798	49.3959	0.472731	0.492375	7.37432e-06	431.45	0.127205	0.182624	8.18e-05
3164-03J	6	82068.5	65.0353	15949.6	21.4269	190.278	3.25614	973.708	17.9963	1.47577	2.12282	14799.7	27	14.685	0.68	30.066	0.81	68.37	1.2	93.25	1.4	0.0562325	12.2966	9.25	13.31	18.4084	0.0610492	0.0011313	0.119656	0.0022173	0.0072002	2.26751e-07	0.01193	0.0002048	5.1455	0.0080256	5.12024	0.0406436	99.5632	32.3964	0.254861	0.270529	1.46e-05	176.913	0.19445	0.156068	0.0002278
Integrated age: 35.3 ± 0.3 Ma
TK46, GSC irradiation #67, tube A, J = 0.003530 ± 0.00001 (1σ)
Aliquot 1
3165-02A	0.1	251401	127.027	2220.85	6.72077	199.139	2.77987	37.6981	5.37293	845.372	5.23605	8460.5	17	15.608	0.79	18.181	0.7	76.52	1.3	73.37	1.5	0.00782994	0.694101	38065.2	262.4	0.0012442	0.0169746	0.0024199	0.0332702	0.0047429	0.042788	4.85021e-07	0.0896679	0.0012808	113.2	0.347309	-0.448557	0.706255	-0.396257	-2.85845	4.5042	4.50421	0.0033627	0.621457	0.008834	0.306822	0.0133908
3165-02B	0.2	288068	114.564	17396.2	18.9056	365.211	4.22798	51.3516	6.13732	804.08	5.87359	8460.5	17	15.608	0.79	18.181	0.7	76.52	1.3	73.37	1.5	0.0613328	5.43697	4622.16	34.14	0.0017818	0.0029519	0.0003528	0.0057857	0.0006915	0.0093757	7.07154e-08	0.0209937	0.0002441	16.5592	0.0191632	2.75661	0.101097	16.65	17.4678	0.637533	0.639432	0.0027917	0.731585	0.0604001	0.115746	0.0186885
3165-02C	0.3	254546	164.531	82488.1	50.3771	990.808	7.00332	69.8762	6.16173	99.5893	2.78247	8460.5	17	15.608	0.79	18.181	0.7	76.52	1.3	73.37	1.5	0.290823	25.7807	120.73	3.37	0.0195758	0.0008471	7.47e-05	0.0016603	0.0001464	0.0064281	1.49725e-08	0.0120115	8.52e-05	3.08585	0.0027441	2.72249	0.0106971	88.311	17.2527	0.0674655	0.0831761	0.0003915	2.79554	0.324375	0.0890119	0.0168306
3165-02D	0.35	147847	315.171	60730.7	45.3407	729.602	4.87972	49.4972	6.42186	27.0681	2.55758	8460.5	17	15.608	0.79	18.181	0.7	76.52	1.3	73.37	1.5	0.214114	18.9806	44.57	4.21	0.0510185	0.000815	0.0001057	0.0015975	0.0002073	0.0072925	2.11949e-08	0.0120137	8.08e-05	2.43447	0.0054987	2.29851	0.0139367	94.5315	14.5767	0.0880279	0.097164	0.0001832	9.4587	0.411273	0.226148	0.0213
3165-02E	0.4	34093.2	44.1671	12949.5	22.6987	158.228	2.21907	42.9893	5.63251	9.27072	2.09179	8633.8	15	19.39	1.2	18.878	0.63	69.5	1.1	75.11	1.2	0.0456553	4.04721	71.59	16.15	0.129375	0.0033198	0.000435	0.0065067	0.0008526	0.0082075	8.71886e-08	0.0122189	0.0001727	2.63279	0.0057385	2.41636	0.0485993	91.8843	15.3209	0.306839	0.309868	0.0002718	22.5978	0.380258	0.218212	0.0034138
3165-02F	0.5	72807	53.7482	26505.8	32.7631	321.685	3.01289	63.19	5.6312	23.7707	2.29141	8633.8	15	19.39	1.2	18.878	0.63	69.5	1.1	75.11	1.2	0.09345	8.28407	89.68	8.65	0.0741669	0.002384	0.0002125	0.0046727	0.0004164	0.007516	4.25866e-08	0.0121364	0.0001147	2.74683	0.0039547	2.47632	0.0261909	90.2503	15.6994	0.165325	0.171154	0.0003266	9.64863	0.364453	0.144132	0.0039307
3165-02G	0.6	22979.2	38.3067	7942.37	15.1589	100.824	1.66774	31.1832	5.86137	22.1879	2.28682	8633.8	15	19.39	1.2	18.878	0.63	69.5	1.1	75.11	1.2	0.028002	2.48229	279.36	28.8	0.0392111	0.0039262	0.000738	0.0076953	0.0014465	0.0087055	1.47926e-07	0.0126945	0.0002114	2.89325	0.0073318	2.05656	0.0862265	71.1551	13.0479	0.54509	0.546333	0.0009661	10.3128	0.34599	0.253674	0.010651
3165-02H	0.8	23864	38.939	6638.29	13.8812	75.0507	1.91191	44.1301	6.2767	21.4808	2.78349	8534.4	19	17.572	0.9	22.144	0.77	77.72	1.4	74.44	2.2	0.0234042	2.07472	323.59	41.94	0.0573178	0.0066478	0.0009456	0.0130297	0.0018534	-2.41e-05	1.89537e-07	0.0113057	0.000289	3.59489	0.009535	2.62635	0.125475	73.1186	16.6462	0.79162	0.793011	0.0009004	12.9668	0.278403	0.26546	0.007752
3165-02I	1.5	57367.4	46.8285	25210.9	26.46	295.118	2.86879	385.78	7.01018	19.2741	3.01387	8534.4	19	17.572	0.9	22.144	0.77	77.72	1.4	74.44	2.2	0.0888847	7.87937	76.45	11.95	0.55843	0.0153021	0.0002785	0.0299921	0.0005459	0.0051133	5.58257e-08	0.011706	0.0001145	2.2755	0.0030255	2.04556	0.0358949	90.0131	12.9783	0.226922	0.229861	0.0003345	15.727	0.44004	0.133138	0.0031934
3165-02J	6	77908.8	58.5574	77878.4	44.0838	918.669	4.63661	251.794	6.64866	3.88606	2.854	8534.4	19	17.572	0.9	22.144	0.77	77.72	1.4	74.44	2.2	0.274571	24.34	4.99	3.66	1.80776	0.0032332	8.54e-05	0.006337	0.0001674	0.0064453	1.71154e-08	0.0117962	5.99e-05	1.00039	0.0009413	0.982796	0.0112628	98.5366	6.24712	0.0714678	0.0736196	4.9e-05	74.9624	1.00262	0.094376	0.0008042
Integrated age (shaded steps only): 14.5 ± 0.6 Ma
Aliquot 2
3165-03A	0.1	130388	63.0385	1630.26	6.57483	109.272	2.21415	21.0485	12.5786	424.094	4.00986	7241.4	13	11.978	0.57	32.824	0.79	79.37	1.2	68.2	1.1	0.0057477	0.348108	26013.9	267.41	0.0013847	0.0129111	0.0077159	0.0253058	0.0151231	0.0432413	1.54653e-06	0.0670277	0.0013848	79.9798	0.324868	2.31123	0.735464	2.88985	14.657	4.64517	4.64535	0.0032526	0.946798	0.0125035	0.406207	0.0060785
3165-03B	0.2	237906	109.038	9686.41	15.1262	257.781	3.50058	52.3899	12.0131	741.235	5.58916	7241.4	13	11.978	0.57	32.824	0.79	79.37	1.2	68.2	1.1	0.0341508	2.06834	7652.32	58.93	0.001972	0.0054086	0.0012402	0.0106009	0.0024309	0.0088253	2.48584e-07	0.0266127	0.0003638	24.5608	0.0399718	1.71157	0.172685	6.96954	10.8656	1.09297	1.0934	0.003116	0.755469	0.0407201	0.162767	0.0170898
3165-03C	0.3	284054	327.558	41087.2	31.4958	594.779	4.87308	85.3315	11.465	639.959	4.81047	7241.4	13	11.978	0.57	32.824	0.79	79.37	1.2	68.2	1.1	0.144859	8.77334	1557.56	11.77	0.0037202	0.0020768	0.000279	0.0040706	0.0005469	0.0049818	5.59301e-08	0.014476	0.0001191	6.91345	0.009573	2.26042	0.035983	32.7101	14.3361	0.227308	0.23088	0.0022538	0.760546	0.144708	0.138529	0.126344
3165-03D	0.35	94973.2	164.166	31707	27.7176	399.781	3.65039	82.1026	10.9107	69.7623	2.06146	7241.4	13	11.978	0.57	32.824	0.79	79.37	1.2	68.2	1.1	0.111788	6.77039	220.02	6.5	0.0328352	0.0025894	0.0003441	0.0050752	0.0006745	0.0088592	6.89726e-08	0.0126086	0.0001157	2.99533	0.005802	2.33574	0.0203486	78.0572	14.8118	0.12851	0.135135	0.000735	2.96147	0.334187	0.193897	0.0521505
3165-03E	0.4	126514	189.591	46941.9	49.1322	559.48	4.92822	63.6215	11.9723	34.9178	2.50203	7486.2	17	18.181	0.82	32.245	0.64	79.4	1.2	69.63	1.4	0.1655	10.0235	74.39	5.33	0.0508349	0.0013553	0.000255	0.0026564	0.0004999	0.0063949	5.11206e-08	0.0119185	0.0001057	2.69511	0.0049264	2.4702	0.0168084	91.7569	15.6608	0.106102	0.114932	0.0002761	7.17282	0.371455	0.182994	0.0171543
3165-03F	0.5	188724	340.313	79733.5	120.927	932.717	5.7142	56.7246	11.4249	26.7176	2.50161	7486.2	17	18.181	0.82	32.245	0.64	79.4	1.2	69.63	1.4	0.281112	17.0255	33.51	3.14	0.0592351	0.0007114	0.0001433	0.0013944	0.0002809	0.0055435	2.87206e-08	0.0116979	7.38e-05	2.36693	0.005577	2.264	0.0111376	95.7726	14.3587	0.0703561	0.0811904	0.0001416	9.37547	0.423024	0.235923	0.0147465
3165-03G	0.6	134874	315.171	61855.7	78.101	729.308	5.37045	93.2235	11.4666	19.0497	2.69966	7486.2	17	18.181	0.82	32.245	0.64	79.4	1.2	69.63	1.4	0.218081	13.208	30.8	4.36	0.136534	0.0015071	0.0001854	0.0029539	0.0003634	0.0061228	3.71579e-08	0.0117905	8.81e-05	2.18046	0.0057915	2.0857	0.0144561	95.7856	13.232	0.0913764	0.0987161	0.0001412	14.202	0.45925	0.265974	0.0145008
3165-03H	0.8	212626	177.056	94433.8	69.2842	1118.23	7.00055	94.4166	11.4943	18.566	2.13707	7486.2	17	18.181	0.82	32.245	0.64	79.4	1.2	69.63	1.4	0.33294	20.1644	19.66	2.26	0.141884	0.0009998	0.0001217	0.0019596	0.0002386	0.0065494	2.43968e-08	0.0118414	7.46e-05	2.25159	0.0024989	2.19004	0.0076164	97.3959	13.8914	0.0481256	0.0620746	8.72e-05	11.5395	0.444722	0.11113	0.005425
3165-03I	1.5	146664	73.011	60412.3	39.0854	731.452	5.18309	101.32	11.778	42.6921	2.38539	7547	19	21.85	1.7	31.567	0.83	78.37	1.1	70.51	1.1	0.212992	12.8998	70.67	3.95	0.0662142	0.0016771	0.000195	0.0032872	0.0003821	0.007558	3.90773e-08	0.0121077	8.62e-05	2.42772	0.0019818	2.21394	0.0121965	91.3071	14.0425	0.0770587	0.0866528	0.0002912	5.59336	0.412419	0.0817341	0.0054385
3165-03J	6	120124	63.3414	40830.8	26.5068	491.508	4.05448	100.311	11.1715	89.0815	2.03771	7547	19	21.85	1.7	31.567	0.83	78.37	1.1	70.51	1.1	0.143955	8.71859	218.17	4.99	0.0314171	0.0024567	0.0002736	0.0048152	0.0005363	0.0054942	5.48405e-08	0.0120377	9.96e-05	2.942	0.0024605	2.28788	0.015261	77.8455	14.5096	0.0963961	0.104731	0.000742	2.28905	0.340251	0.0837208	0.0145477
Isochron age: 14.1 ± 0.4 Ma (MSWD = 50, steps A-J, n = 10, 40Ar/36Ar intercept = 300 ± 20)
Integrated age: 14.2 ± 0.4 Ma
TK56, GSC irradiation #67, tube A, J = 0.003514 ± 0.00001 (1σ)
Aliquot 1
3166-02A	0.1	20927.7	37.8451	1845.97	7.48406	33.9269	1.56848	16.1557	5.5326	62.8733	3.46568	8534.4	19	17.572	0.9	22.144	0.77	77.72	1.4	74.44	2.2	0.00650821	1.90255	3405.98	188.25	0.0071691	0.0087519	0.0029973	0.0171537	0.0058748	0.0074654	6.00769e-07	0.018379	0.0008529	11.337	0.0503283	1.16586	0.560941	10.2864	7.37612	3.54169	3.54176	0.0030049	5.51566	0.0882297	0.44405	0.0133623
3166-02B	0.2	62530.6	110.677	23388.9	23.9399	285.454	2.8968	34.3716	6.16019	39.5576	2.15993	8557.2	23	18.146	0.81	22.272	0.7	76.6	1.3	76.36	1.1	0.082461	24.1059	169.13	9.24	0.0242423	0.0014696	0.0002634	0.0028804	0.0005162	0.0070326	5.27913e-08	0.0122047	0.0001245	2.67351	0.0054663	2.16572	0.0281744	81.0974	13.678	0.177268	0.18146	0.0006331	5.46491	0.37446	0.204691	0.0280772
3166-02C	0.3	34646.1	49.7016	19206.5	22.6814	229.169	2.61109	17.2748	5.64416	6.61956	1.94121	8557.2	23	18.146	0.81	22.272	0.7	76.6	1.3	76.36	1.1	0.0677153	19.7952	34.47	10.11	0.0728096	0.0008994	0.0002939	0.0017629	0.000576	0.0069199	5.89013e-08	0.0119319	0.0001367	1.80387	0.0033518	1.69809	0.0304562	94.2922	10.7334	0.191938	0.194339	0.0001912	29.3576	0.555286	0.186119	0.0037815
3166-02D	0.35	8753.39	38.9799	4996.88	10.6089	59.1839	1.88264	16.5997	5.63077	-0.503516	2.02928	8557.2	23	18.146	0.81	22.272	0.7	76.6	1.3	76.36	1.1	0.0176172	5.15004	-10.08	40.61	-0.919795	0.003322	0.0011269	0.0065112	0.0022087	0.0068983	2.25865e-07	0.0118442	0.0003776	1.75177	0.0086421	1.77917	0.121586	101.738	11.2443	0.76603	0.766694	-5.82e-05	-398.898	0.571829	0.494181	0.0010098
3166-02E	0.4	15225.2	42.6231	8253.51	15.124	98.1796	1.81632	5.9294	5.76868	1.67742	1.98224	8672.9	22	14.92	0.62	19.216	0.45	75.94	1.4	74.13	1.2	0.0290989	8.50649	20.32	24.02	0.098622	0.0007184	0.0006989	0.0014081	0.0013699	0.0068624	1.40091e-07	0.0118955	0.0002211	1.8447	0.0061722	1.78112	0.0720097	96.7104	11.2566	0.453681	0.454803	0.0001102	118.359	0.542976	0.335135	0.0019832
3166-02F	0.5	5991.73	32.4973	4058.09	10.5961	53.7466	1.55895	1.48954	5.76545	6.4562	2.27464	8672.9	22	14.92	0.62	19.216	0.45	75.94	1.4	74.13	1.2	0.0143074	4.18247	159.09	56.05	0.0064369	0.0003671	0.0014207	0.0007194	0.0027846	0.0133097	2.84763e-07	0.0132443	0.0003857	1.47649	0.0088877	0.998597	0.167583	67.7708	6.31973	1.05871	1.05886	0.0010795	35.244	0.67866	0.603175	0.0138996
3166-02G	0.6	3390.07	32.4973	2139.25	7.95763	28.2177	1.1702	-10.6433	5.52234	-0.191594	2.17136	8672.9	22	14.92	0.62	19.216	0.45	75.94	1.4	74.13	1.2	0.00754224	2.20483	-8.96	101.5	1.54988	-0.0049753	0.0025815	-0.0097515	0.0050597	0.0148679	5.1742e-07	0.0131904	0.0005492	1.5847	0.0162946	1.60809	0.303495	101.669	10.1662	1.91326	1.91348	-5.59e-05	-1147.89	0.632234	1.03019	0.0007802
3166-02H	0.8	12507.3	33.4347	2208.2	8.83671	25.2378	1.14718	4.59082	5.53404	2.19073	2.07341	8672.9	22	14.92	0.62	19.216	0.45	75.94	1.4	74.13	1.2	0.00778532	2.27589	99.21	93.9	0.0584664	0.002079	0.0025061	0.0040748	0.004912	0.0032152	5.02316e-07	0.0114291	0.0005215	5.66401	0.0272581	5.36501	0.281582	94.7711	33.696	1.75212	1.75469	0.0001751	94.7078	0.176647	0.481507	0.0015693
3166-02I	1.5	43989	45.0323	23823.5	25.1961	291.137	3.16121	30.2376	5.89779	12.718	2.26494	8516.1	14	14.871	0.73	19.235	0.75	72.77	1.3	74.49	1.5	0.0839931	24.5537	53.38	9.51	0.0663335	0.0012692	0.0002476	0.0024877	0.0004852	0.0084208	4.96205e-08	0.0122206	0.0001333	1.84645	0.0027178	1.68422	0.0286134	91.3621	10.646	0.180333	0.182845	0.0002893	17.8261	0.542459	0.147431	0.004004
3166-02J	6	11081.1	31.0321	7105.11	13.8712	84.8989	1.81946	12.6454	5.90059	6.30334	2.3548	8516.1	14	14.871	0.73	19.235	0.75	72.77	1.3	74.49	1.5	0.0250501	7.3229	88.72	33.14	0.0559715	0.0017798	0.0008305	0.0034883	0.0016277	0.0064152	1.66456e-07	0.011949	0.0002571	1.5596	0.0053241	1.29191	0.0991118	82.9957	8.17181	0.6255	0.62593	0.0005695	37.3852	0.642426	0.342037	0.0061608
Integrated age (shaded steps only): 10.2 ± 0.4 Ma
Aliquot 2
3166-03A	0.1	16952.5	39.4367	1204.46	5.96122	26.4174	1.67	-13.0544	12.8945	52.6206	3.2077	7263.6	22	12.75	1.4	32.712	0.75	82.16	1.1	65.97	2.1	0.00424648	1.31679	4368.83	267.2	-0.0069216	-0.0108384	0.0107058	-0.0212433	0.0209834	0.0177761	2.14581e-06	0.0219331	0.0013908	14.0748	0.0769719	1.02751	0.795838	7.30197	6.5024	5.02723	5.02726	0.0031048	6.1002	0.0710645	0.54699	0.0162288
3166-03B	0.2	53475.1	140.21	27777.5	29.0053	332.683	3.26423	44.4345	10.7338	34.3523	2.94808	7263.6	22	12.75	1.4	32.712	0.75	82.16	1.1	65.97	2.1	0.0979335	30.3682	123.67	10.61	0.0360885	0.0015997	0.0003864	0.0031353	0.0007574	0.0061889	7.74524e-08	0.0119767	0.0001182	1.92512	0.0054332	1.55309	0.0322257	80.8005	9.81933	0.203192	0.205094	0.0006431	8.59062	0.520258	0.282665	0.0284067
3166-03C	0.3	73063.5	97.001	30789.5	26.4634	387.344	3.89097	172.503	14.4052	78.9524	2.48971	7418.9	16	14.812	0.77	34.868	0.73	83.63	1.1	68.63	1.3	0.108553	33.6611	256.43	8.09	0.0609586	0.0056027	0.0004679	0.0109812	0.0009171	0.0082857	9.37805e-08	0.0125804	0.0001268	2.373	0.003753	1.60496	0.0245153	67.7196	10.1464	0.154548	0.157208	0.0010812	3.15857	0.421939	0.158356	0.0353429
3166-03D	0.35	23647.3	38.7092	7594.53	15.1352	90.7887	2.40894	-1.03773	10.7588	34.2765	2.25867	7418.9	16	14.812	0.77	34.868	0.73	83.63	1.1	68.63	1.3	0.0267756	8.30286	451.33	29.75	-0.0008447	-0.0001366	0.0014166	-0.0002678	0.0027766	0.0023941	2.83944e-07	0.0119545	0.0003181	3.11373	0.0080303	1.76324	0.089048	56.6827	11.144	0.561062	0.561952	0.0014509	6.59188	0.321468	0.258148	0.0157866
3166-03E	0.4	2221.61	28.7763	1467.2	5.72045	12.8725	1.55377	-17.6453	11.8395	0.466276	2.14223	7418.9	16	14.812	0.77	34.868	0.73	83.63	1.1	68.63	1.3	0.00517282	1.60404	31.78	146.01	-1.05582	-0.0120265	0.0080696	-0.023572	0.0158165	-0.0117815	1.61743e-06	0.0087735	0.0010596	1.51418	0.0204823	1.41518	0.436418	93.6479	8.94961	2.75307	2.75319	0.0002128	454.144	0.661738	1.35538	0.0027371
3166-03F	0.5	4166.4	31.9842	2751.35	7.47164	30.0451	1.57029	2.2148	10.2362	-1.93689	1.95948	7418.9	16	14.812	0.77	34.868	0.73	83.63	1.1	68.63	1.3	0.00970028	3.00797	-70.4	71.22	-0.0319032	0.000805	0.0037204	0.0015778	0.007292	0.0020924	7.45697e-07	0.0109201	0.0005715	1.51431	0.0123308	1.72158	0.213022	113.913	10.8814	1.34237	1.34273	-0.000466	-101.131	0.661677	0.815904	0.0071723
3166-03G	0.6	9726.86	34.7562	4992.63	11.3577	59.2919	1.88587	-18.0031	12.297	3.7783	1.83671	7261.5	21	13.165	0.69	31.28	0.9	83.32	1.4	69.39	1.1	0.0176022	5.45828	75.68	36.79	-0.13294	-0.0036059	0.002463	-0.0070676	0.0048276	0.0061267	4.93678e-07	0.0118759	0.0003787	1.94824	0.0082526	1.71905	0.110158	88.3723	10.8655	0.694175	0.694859	0.0003895	48.5626	0.514076	0.424245	0.0062194
3166-03H	0.8	7861.87	30.894	4097.72	9.09557	54.0733	1.58141	-4.01696	12.8271	4.59146	1.74522	7261.5	21	13.165	0.69	31.28	0.9	83.32	1.4	69.39	1.1	0.0144471	4.4799	112.05	42.59	-0.024409	-0.0009803	0.0031303	-0.0019214	0.0061354	0.0135488	6.27418e-07	0.0131959	0.000387	1.9186	0.008659	1.5811	0.127458	82.5385	9.996	0.803581	0.804081	0.0005849	38.0183	0.52203	0.452024	0.0090174
3166-03I	1.5	6184.84	30.894	3620.34	9.84933	40.4331	1.86456	-10.668	12.8204	-0.717432	2.02606	7261.5	21	13.165	0.69	31.28	0.9	83.32	1.4	69.39	1.1	0.012764	3.958	-19.82	55.96	0.414866	-0.0029467	0.0035412	-0.0057755	0.0069408	0.0029982	7.09783e-07	0.0111683	0.0005159	1.70836	0.009717	1.7643	0.167395	103.457	11.1506	1.05469	1.05517	-0.0001158	-283.459	0.586389	0.569794	0.001551
3166-03J	6	15198.4	30.894	7173.71	10.9805	93.0899	2.03219	31.3875	12.8644	12.3162	1.93637	7261.5	21	13.165	0.69	31.28	0.9	83.32	1.4	69.39	1.1	0.0252919	7.84278	171.69	26.99	0.0711024	0.0043754	0.0017933	0.0085757	0.0035148	0.0115818	3.59434e-07	0.0129765	0.000284	2.11863	0.005391	1.60352	0.0807836	75.7938	10.1373	0.509275	0.510087	0.0008108	15.7385	0.472671	0.254818	0.0103378
Plateau age: 10.1 ± 0.4 Ma (MSWD = 0.97, steps A-J, n = 10, 100% 39Ar released)
Isochron age: 10.0 ± 0.4 Ma (MSWD = 1.0, steps A-J, n = 10, 40Ar/36Ar intercept = 310 ± 30)
Integrated age: 10.1 ± 0.4 Ma
Aliquot 3
3166-04A	0.1	20454.8	103.049	767.528	4.56981	23.1864	1.64822	52.8382	13.6771	63.641	3.06268	15497.9	27	11.68	1.2	32.681	0.93	69.65	1.1	97.33	2	0.00270603	0.6987	8291.69	402.07	0.0231641	0.0688421	0.0178244	0.134931	0.0349359	0.0230162	3.57262e-06	0.0302092	0.002155	26.6502	0.207854	1.89758	1.19905	7.12078	11.9901	7.55128	7.55136	0.0031109	4.84009	0.0375257	0.780044	0.0672466
3166-04B	0.2	19039.9	122.6	3944.1	10.9004	57.9274	1.66469	83.7184	15.198	35.8704	2.79673	15497.9	27	11.68	1.2	32.681	0.93	69.65	1.1	97.33	2	0.0139055	3.59042	909.47	70.95	0.0651161	0.0212262	0.0038538	0.0416034	0.0075534	0.0134812	7.72431e-07	0.0146871	0.000424	4.82744	0.0338267	2.11107	0.214083	43.7572	13.3342	1.34723	1.34776	0.0018838	7.82913	0.207275	0.701154	0.0756355
3166-04C	0.3	52345.2	104.264	21932.1	27.7246	262.212	3.66723	-31.4498	14.9151	39.8787	3.09946	15679	27	16.227	0.73	31.775	0.78	74.42	1.2	88.26	2.3	0.0773246	19.9653	181.83	14.13	-0.0220029	-0.001434	0.0006801	-0.0028106	0.0013329	0.0054135	1.36307e-07	0.0119557	0.0001679	2.3867	0.0056305	1.84077	0.0425988	77.2233	11.6324	0.268328	0.270349	0.0007629	7.77421	0.419517	0.236209	0.0216686
3166-04D	0.35	29262	67.3339	16007	18.9107	191.639	2.93523	-39.9985	14.9444	19.5516	2.8086	15679	27	16.227	0.73	31.775	0.78	74.42	1.2	88.26	2.3	0.0564349	14.5716	122.14	17.55	-0.0570774	-0.0024988	0.0009336	-0.0048977	0.0018299	0.0061786	1.87129e-07	0.0119722	0.0001839	1.82808	0.0047285	1.46026	0.0526441	80.0109	9.23394	0.332045	0.333077	0.0006695	14.3619	0.547923	0.259088	0.0142822
3166-04E	0.4	18922.9	46.4244	9108.61	13.8767	106.761	1.96309	-25.8501	13.5713	15.4814	3.01692	15679	27	16.227	0.73	31.775	0.78	74.42	1.2	88.26	2.3	0.0321137	8.2918	169.96	33.12	-0.046586	-0.002838	0.00149	-0.0055624	0.0029203	0.004154	2.98637e-07	0.0117209	0.0002163	2.07747	0.0059995	1.56683	0.0990836	75.5293	9.90598	0.624721	0.625353	0.0008196	19.4824	0.482052	0.289206	0.0107181
3166-04F	0.5	19808.2	44.4005	9670.04	13.8836	122.66	2.30881	61.6467	16.4244	12.8206	3.01182	15417.2	27	11.973	0.85	29.654	0.85	66.21	1.2	90.08	2.4	0.0340931	8.80288	132.58	31.15	0.134154	0.006375	0.0016985	0.012495	0.0033291	0.0102877	3.40439e-07	0.0126845	0.0002395	2.04841	0.0054527	1.65023	0.0931706	80.6791	10.4317	0.587269	0.588014	0.0006471	23.5321	0.488897	0.266581	0.0080365
3166-04G	0.6	17227.8	48.4946	9043.68	13.8836	107.556	2.29841	13.3255	15.6465	3.86081	3.00671	15417.2	27	11.973	0.85	29.654	0.85	66.21	1.2	90.08	2.4	0.0318848	8.23269	42.69	33.25	0.0962963	0.0014735	0.0017301	0.002888	0.003391	0.0065976	3.46771e-07	0.011893	0.0002548	1.90496	0.0061079	1.77469	0.0994786	93.3088	11.2161	0.626757	0.627564	0.0002241	77.9998	0.525774	0.321137	0.0031746
3166-04H	0.8	14035.1	38.6781	7645.08	13.8836	92.1498	2.07364	22.084	12.3251	6.28867	2.87288	15417.2	27	11.973	0.85	29.654	0.85	66.21	1.2	90.08	2.4	0.0269538	6.95951	82.26	37.58	0.0979766	0.0028887	0.0016122	0.0056618	0.0031599	0.0071073	3.23134e-07	0.0120535	0.0002721	1.83584	0.0060589	1.58757	0.112377	86.6179	10.0367	0.708486	0.709058	0.0004482	45.7451	0.545601	0.330576	0.0050412
3166-04I	1.5	42876.8	57.1359	21723.4	23.9508	269.929	3.06277	73.2697	14.2967	18.3322	3.08537	15417.2	27	11.973	0.85	29.654	0.85	66.21	1.2	90.08	2.4	0.0765889	19.7754	84.39	14.2	0.11151	0.0033728	0.0006581	0.0066108	0.0012899	0.0092911	1.31913e-07	0.0124257	0.0001417	1.97376	0.0034137	1.71919	0.0426037	87.2348	10.8664	0.268473	0.270237	0.0004276	16.857	0.507417	0.173217	0.0061039
3166-04J	6	16654.2	42.1157	10009.3	17.655	115.57	1.96762	-6.00869	14.9224	6.21871	2.06004	15382.9	21	15.058	0.8	31.24	0.88	69.63	1.3	89.35	1.3	0.0352893	9.11174	62.13	20.58	-0.0269578	-0.0006003	0.0014909	-0.0011766	0.0029221	0.0043235	2.98817e-07	0.0115462	0.0001976	1.66387	0.0051301	1.47537	0.0616996	88.8313	9.32924	0.38914	0.39004	0.0003741	33.1282	0.602096	0.308878	0.0062762
Plateau age: 10.7 ± 0.4 Ma (MSWD = 0.94, steps E-I, n = 5, 52.1% 39Ar released)
Isochron age: 10.0 ± 0.7 Ma (MSWD = 3.6, steps A,D-J, n = 8, 40Ar/36Ar intercept = 310 ± 60)
Integrated age: 10.6 ± 0.3 Ma
TK40, GSC irradiation #67, tube A, J = 0.003503 ± 0.00001 (1σ)
3167-01A	0.1	12059.9	31.0321	964.842	5.08976	16.1922	1.27467	12.6757	5.65469	30.1459	2.36464	8516.1	14	14.871	0.73	19.235	0.75	72.77	1.3	74.49	1.5	0.00340169	0.693373	3124.44	245.63	0.0117313	0.0131376	0.0058611	0.0257496	0.0114879	0.0011443	1.17477e-06	0.0167822	0.0013241	12.4993	0.0733628	3.16911	0.732635	25.3601	19.9191	4.57957	4.57992	0.0025	7.84926	0.0800228	0.587079	0.0143785
3167-01B	0.2	20451	35.3694	7936.19	16.3878	89.2511	1.77356	6.39192	5.88451	5.48944	2.11902	8468.9	22	14.311	0.75	21.004	0.66	76.74	1.3	77.53	1.1	0.0279801	5.70325	69.17	26.7	0.0324868	0.0008054	0.0007415	0.0015786	0.0014533	0.0024653	1.48618e-07	0.0112461	0.0002247	2.57693	0.006941	2.36749	0.0800327	91.9798	14.9014	0.501664	0.503449	0.0002686	38.6178	0.388511	0.269666	0.0028809
3167-01C	0.3	9214.76	35.3694	5816.88	11.107	73.3512	2.09511	0.538214	5.87405	-3.55223	2.0151	8468.9	22	14.311	0.75	21.004	0.66	76.74	1.3	77.53	1.1	0.0205082	4.18024	-61.07	34.64	-0.0042273	9.25e-05	0.0010098	0.0001814	0.0019793	0.0120096	2.02404e-07	0.0126101	0.000361	1.58414	0.0067913	1.76353	0.103694	111.535	11.1116	0.651343	0.652111	-0.0003864	-56.7089	0.632455	0.429519	0.006074
3167-01D	0.35	54927.6	70.2524	36544.8	34.0087	436.215	4.01175	-1.71051	5.61587	3.86346	2.0169	8468.9	22	14.311	0.75	21.004	0.66	76.74	1.3	77.53	1.1	0.128844	26.2625	10.57	5.52	-0.0123524	-4.68e-05	0.0001537	-9.17e-05	0.0003012	0.0072142	3.08009e-08	0.0119365	0.0001103	1.50302	0.0023774	1.46849	0.0168327	97.898	9.25741	0.105842	0.109074	7.04e-05	52.2596	0.666656	0.158489	0.0019844
3167-01E	0.4	25187	51.5116	18620.4	25.1967	223.171	2.76562	-1.67971	5.86873	-0.442594	2.2191	8468.9	22	14.311	0.75	21.004	0.66	76.74	1.3	77.53	1.1	0.0656488	13.3813	-2.38	11.92	0.105885	-9.02e-05	0.0003152	-0.0001768	0.0006177	0.0076485	6.31723e-08	0.0119853	0.0001494	1.35266	0.0033171	1.35679	0.035824	100.528	8.55487	0.225345	0.226658	-1.77e-05	-499.196	0.740929	0.245776	0.0003427
3167-01F	0.5	30091.6	45.6808	21417.3	25.2054	253.743	3.1511	-13.1344	6.13177	7.33369	2.19946	8528.4	19	18.82	1	20.91	0.68	75.93	1.3	74.45	1.4	0.0755099	15.3913	34.24	10.27	-0.049968	-0.0006133	0.0002863	-0.001202	0.0005611	0.0064222	5.73843e-08	0.0118475	0.0001478	1.40501	0.0026988	1.29976	0.030875	92.7068	8.19612	0.194252	0.19565	0.0002443	29.9867	0.713262	0.192492	0.0040128
3167-01G	0.6	18172	34.631	12039.5	17.6582	145.645	2.38379	-1.93627	5.14571	7.2624	2.02665	8528.4	19	18.82	1	20.91	0.68	75.93	1.3	74.45	1.4	0.0424471	8.65208	60.32	16.83	-0.0074386	-0.0001608	0.0004274	-0.0003152	0.0008377	0.0076116	8.56657e-08	0.0120973	0.0001988	1.50936	0.0036297	1.32629	0.0504404	88.046	8.36302	0.317321	0.318213	0.0004004	27.9111	0.663853	0.240958	0.0054258
3167-01H	0.8	11494.9	32.5553	6596.56	15.1444	81.6845	2.00258	3.20762	5.64747	11.1157	2.11931	8528.4	19	18.82	1	20.91	0.68	75.93	1.3	74.45	1.4	0.0232571	4.74055	168.51	32.13	0.008051	0.0004863	0.0008561	0.0009531	0.001678	0.0080961	1.71596e-07	0.0123829	0.0003049	1.74256	0.006353	1.23655	0.0961233	71.0838	7.79837	0.6049	0.605308	0.0009685	19.0715	0.574858	0.365208	0.0115641
3167-01I	1.5	13479	35.7674	2888.09	10.612	39.5654	1.52334	9.91728	5.37875	30.7182	2.52831	8723.3	21	16.804	0.85	18.3	0.68	74.59	1.3	74	1.3	0.0101824	2.0755	1063.61	87.63	0.0090074	0.0034338	0.0018624	0.0067303	0.0036504	0.0058984	3.73294e-07	0.0136995	0.0005299	4.66709	0.0211531	1.48888	0.261735	31.9221	9.38557	1.64564	1.64586	0.0022802	8.23593	0.214404	0.453533	0.0188838
3167-01J	6	39298.4	49.9476	26327.3	22.6829	322.304	3.46231	-4.32376	5.88875	15.1966	2.42093	8723.3	21	16.804	0.85	18.3	0.68	74.59	1.3	74	1.3	0.0928206	18.9198	57.72	9.2	-0.0079381	-0.0001642	0.0002237	-0.0003219	0.0004384	0.0085001	4.4832e-08	0.0122422	0.0001319	1.49269	0.002292	1.31738	0.0276568	88.4335	8.307	0.173994	0.175595	0.0003874	15.9343	0.671282	0.153858	0.00662
Plateau age: 8.3 ± 0.2 Ma (MSWD = 0.53, steps E-J, n = 6, 63.2% 39Ar released)
Isochron age: 8.3 ± 0.3 Ma (MSWD = 0.65, steps E-J, n = 6, 40Ar/36Ar intercept = 300 ± 50)
Integrated age: 9.1 ± 0.2 Ma
Aliquot 2
3167-02A	0.1	70026	59.7495	872.916	4.98734	60.1769	1.99778	30.5837	10.6056	220.424	2.69862	7244.3	19	13.774	0.86	29.921	0.69	81.83	1.1	67.39	1.2	0.00307759	0.2113	25251.5	341.16	0.0038711	0.0350363	0.0121513	0.0686711	0.0238166	0.0630949	2.43553e-06	0.0689378	0.0023223	80.2207	0.463418	4.83058	0.926002	6.02169	30.2749	5.75514	5.75578	0.0031477	1.22735	0.0124658	0.577715	0.0102691
3167-02B	0.2	46481.9	36.7619	6063.5	10.9925	97.6646	2.14681	32.6281	10.1022	93.4974	2.60884	7244.3	19	13.774	0.86	29.921	0.69	81.83	1.1	67.39	1.2	0.0213777	1.46774	1541.97	43.12	0.0097364	0.0053811	0.0016661	0.0105469	0.0032656	0.0148284	3.33943e-07	0.016107	0.0003553	7.66586	0.0151623	3.05974	0.128749	39.9294	19.2354	0.805091	0.806941	0.002012	2.79186	0.130499	0.197868	0.0113359
3167-02C	0.3	311194	1259.01	157447	264.524	1905.71	18.444	74.5165	11.6201	152.568	5.50222	7154.2	20	15.71	1.1	31.531	0.82	79.75	1.2	64.26	1.9	0.555103	38.1121	96.9	3.5	0.0136267	0.0004733	7.38e-05	0.0009276	0.0001447	0.0072417	1.47934e-08	0.0121038	0.0001189	1.9765	0.0086584	1.68429	0.0136785	85.3457	10.6138	0.085944	0.0910981	0.0004908	3.63051	0.506715	0.438736	0.103098
3167-02D	0.35	165843	378.183	118428	108.334	1389.02	9.89439	58.3535	13.3191	24.608	2.71262	7154.2	20	15.71	1.1	31.531	0.82	79.75	1.2	64.26	1.9	0.417536	28.6671	20.78	2.29	0.0661599	0.0004927	0.0001125	0.0009658	0.0002204	0.0058685	2.2542e-08	0.0117287	8.42e-05	1.40036	0.0034407	1.33542	0.0080447	95.5672	8.42047	0.0506075	0.0560013	0.0001485	11.0429	0.715634	0.246228	0.0192132
3167-02E	0.4	20802.4	39.4366	15998.8	16.4121	186.632	2.641	8.94181	12.1566	4.43289	2.46698	7154.2	20	15.71	1.1	31.531	0.82	79.75	1.2	64.26	1.9	0.0564059	3.8727	27.71	15.42	0.0562785	0.0005589	0.0007598	0.0010955	0.0014893	0.0054156	1.52299e-07	0.0116654	0.0001655	1.30025	0.0028027	1.21463	0.0461897	93.6305	7.66042	0.290692	0.29151	0.0002133	55.7186	0.770859	0.216051	0.003001
3167-02F	0.5	12828.3	34.631	10057.1	15.2109	127.044	2.37593	-0.550841	10.1335	4.52369	1.88478	7366.2	19	16.88	1.7	31.604	0.89	83.61	1.1	69.4	1.2	0.0354579	2.43445	44.98	18.74	-0.0033973	-5.48e-05	0.0010076	-0.0001074	0.0019749	0.0109554	2.01956e-07	0.0126322	0.000237	1.27554	0.003947	1.13834	0.0561422	89.4544	7.18027	0.353422	0.354013	0.0003532	41.6964	0.78583	0.310168	0.005665
3167-02G	0.6	7108.96	29.5709	5653.38	11.5881	68.2039	2.08228	-23.0785	11.1407	-2.48364	1.79133	7366.2	19	16.88	1.7	31.604	0.89	83.61	1.1	69.4	1.2	0.0199318	1.36847	-43.93	31.69	0.259252	-0.0040822	0.0019706	-0.0080012	0.0038625	0.0085809	3.94983e-07	0.0120643	0.0003692	1.25747	0.0058313	1.38537	0.0948248	110.435	8.73465	0.596419	0.596938	-0.0003495	-72.2731	0.797152	0.464838	0.0051777
3167-02H	0.8	4706.95	31.5417	3693.05	9.10369	41.4724	1.74166	-25.7787	10.5684	2.69988	1.88112	7366.2	19	16.88	1.7	31.604	0.89	83.61	1.1	69.4	1.2	0.0130204	0.893949	73.11	50.94	-0.266392	-0.0069803	0.0028618	-0.0136814	0.005609	0.0023238	5.73593e-07	0.0112299	0.0004724	1.27454	0.0091004	1.05271	0.152364	82.7903	6.64112	0.959436	0.959622	0.0005764	69.5015	0.78645	0.715695	0.009073
3167-02I	1.5	12183.2	31.5417	8934.69	15.2109	108.871	2.43512	8.62039	11.6957	1.96416	2.06775	7366.2	19	16.88	1.7	31.604	0.89	83.61	1.1	69.4	1.2	0.0315005	2.16275	21.98	23.14	0.122449	0.0009648	0.001309	0.0018911	0.0025657	0.0085617	2.62373e-07	0.0121852	0.0002733	1.36359	0.0042251	1.29511	0.0692685	95.1877	8.1669	0.435815	0.436435	0.0001612	105.532	0.734975	0.310538	0.0020557
3167-02J	6	111491	59.5984	85967.4	40.3324	1016.39	6.28318	16.6375	11.7217	18.8646	2.62683	7263.6	22	12.75	1.4	32.712	0.75	82.16	1.1	65.97	2.1	0.30309	20.8095	21.94	3.06	0.0246061	0.0001935	0.0001364	0.0003793	0.0002672	0.0064141	2.73293e-08	0.011823	7.33e-05	1.2969	0.0009224	1.22846	0.0095025	94.9423	7.74748	0.0598003	0.0637421	0.0001694	13.9411	0.772857	0.0712889	0.0028916
Integrated age (shaded steps only): 8.01 ± 0.18 Ma
Aliquot 3
3167-03A	0.1	78525.3	82.5867	1469.17	5.5846	79.3056	1.76149	111.147	15.123	255.815	3.8032	14799.7	27	14.685	0.68	30.066	0.81	68.37	1.2	93.25	1.4	0.00517978	0.35327	17412.1	267.19	0.0121221	0.0756529	0.0102976	0.14828	0.0201833	0.062029	2.06399e-06	0.0539797	0.0012164	53.4486	0.210801	1.467	0.775011	2.7447	9.24801	4.8732	4.87327	0.0032575	1.49068	0.0187097	0.394441	0.0188159
3167-03B	0.2	60900.6	108.007	5844.31	10.8628	105.416	2.12713	76.1177	15.4827	173.211	3.13697	14978.8	22	13.267	0.79	31.381	0.59	67.37	1.3	89.52	1.7	0.020605	1.4053	2963.75	53.96	0.0122607	0.0130242	0.0026493	0.0255275	0.0051926	0.0103836	5.3101e-07	0.0180373	0.0003655	10.4205	0.0267709	1.57013	0.16137	15.0719	9.89636	1.01432	1.01471	0.0028446	1.82005	0.0959916	0.256981	0.0672993
3167-03C	0.3	126731	165.122	35246	28.9855	470.937	3.83251	68.9976	14.1008	256.785	3.4081	14978.8	22	13.267	0.79	31.381	0.59	67.37	1.3	89.52	1.7	0.124265	8.47508	728.55	9.69	0.0074967	0.0019576	0.0004001	0.0038369	0.0007841	0.0076391	8.01882e-08	0.0133614	0.0001093	3.59561	0.00554	1.4177	0.029378	39.4614	8.93798	0.184758	0.186502	0.0020277	1.33381	0.278349	0.154205	0.0826987
3167-03D	0.35	53194.1	165.122	27638.5	27.7262	341.608	3.85996	24.2213	14.068	52.6675	2.77998	14978.8	22	13.267	0.79	31.381	0.59	67.37	1.3	89.52	1.7	0.0974434	6.64582	190.56	10.06	0.0128309	0.0008764	0.000509	0.0017177	0.0009976	0.0077132	1.02021e-07	0.0123598	0.0001402	1.92464	0.0062786	1.35286	0.030752	70.4015	8.53019	0.193443	0.194962	0.0009914	5.28917	0.520389	0.326731	0.0559426
3167-03E	0.4	164183	428.573	119341	176.369	1398.19	9.0692	48.7866	14.7536	57.2813	2.88201	14978.8	22	13.267	0.79	31.381	0.59	67.37	1.3	89.52	1.7	0.420755	28.6963	48	2.42	0.0237625	0.0004088	0.0001236	0.0008012	0.0002423	0.0054882	2.47789e-08	0.0117159	7.79e-05	1.37574	0.0041267	1.22953	0.0086288	89.5676	7.75422	0.0543023	0.0586221	0.0003494	5.0416	0.72847	0.300621	0.0451804
3167-03F	0.5	71320.7	290.295	53469.5	78.1201	635.331	5.04174	100.754	14.3799	17.2568	2.33185	15805.4	21	15.36	1.5	32.12	1	71.48	1.2	97.94	1.4	0.188514	12.857	32.27	4.36	0.162894	0.0018843	0.000269	0.0036933	0.0005271	0.0066498	5.39067e-08	0.0118821	9.59e-05	1.33386	0.0057683	1.23473	0.0144412	92.7769	7.78695	0.0908787	0.093546	0.0002419	13.5514	0.751394	0.43343	0.0283419
3167-03G	0.6	28362.8	116.464	21330.8	25.2401	250.95	3.13507	8.17543	14.3058	7.27219	2.32472	15805.4	21	15.36	1.5	32.12	1	71.48	1.2	97.94	1.4	0.0752049	5.12911	34.09	10.9	0.0313653	0.0003833	0.0006707	0.0007512	0.0013145	0.0059326	1.34423e-07	0.0117646	0.0001476	1.32966	0.0056821	1.22497	0.033121	92.3349	7.72553	0.208437	0.209596	0.0002567	32.0012	0.753772	0.428297	0.0123602
3167-03H	0.8	60406.1	51.0925	49008.8	34.0469	586.734	4.93712	21.0076	14.9754	10.0588	2.22693	15805.4	21	15.36	1.5	32.12	1	71.48	1.2	97.94	1.4	0.172787	11.7844	20.52	4.54	0.0582688	0.0004287	0.0003056	0.0008402	0.0005989	0.007314	6.12457e-08	0.011972	0.0001011	1.23256	0.0013491	1.1684	0.0138587	95.0256	7.36944	0.0872328	0.0897232	0.0001666	22.1816	0.8133	0.109722	0.0029568
3167-03I	1.5	57430	62.7535	40866.6	40.3305	487.744	3.75537	14.0666	15.1853	9.26164	2.7084	15497.9	27	11.68	1.2	32.681	0.93	69.65	1.1	97.33	2	0.144081	9.82658	22.66	6.63	0.0423748	0.0003442	0.0003716	0.0006746	0.0007283	0.0070708	7.44776e-08	0.011935	9.26e-05	1.4053	0.0020692	1.33475	0.0200475	95.1823	8.41623	0.126115	0.128373	0.0001614	29.2899	0.713112	0.147554	0.0027773
3167-03J	6	80388.3	54.9299	61662.9	39.0713	719.036	4.79117	-0.475194	14.3985	12.3552	2.63021	15497.9	27	11.68	1.2	32.681	0.93	69.65	1.1	97.33	2	0.217401	14.8272	20.04	4.27	-0.0010731	-7.70632e-06	0.0002335	-1.51e-05	0.0004577	0.0054736	4.68022e-08	0.0116608	7.8e-05	1.30367	0.0012149	1.24091	0.013033	95.4052	7.82583	0.0820147	0.0849898	0.0001539	21.31	0.768832	0.0934026	0.0023592
Integrated age: 7.97 ± 0.11 Ma
Measured isotope abundances and inverse isochron ratios are corrected for baseline, blank and detector intercalibration. 39Ar and 37Ar abundances are decay corrected values.
Measured isotopic abundances are not corrected for nuclear interference reactions. Inverse isochron ratios are corrected for decay and nuclear interference reactions.
Samples were irradiated in the GSC Rad #67 sample can; irradiation duration 160 MWH, in medium-flux position 8B at McMaster Nuclear Reactor (Cd-shielded).
Decay constants and isotopic abundances after Min et al. (2000).
Ages calculated relative to FCT-Sanidine flux monitor at 28.305 ± 0.036 Ma (1σ, Renne et al., 2010)
Grey cells denote analyses used to calculate plateau ages, while green cells denote subsets of step heat spectra used to calculate modified integrated ages.
Atmospheric argon 40Ar/36Ar = 298.56 (Lee et al., 2006)
Nucleogenic interference correction factors (±2σ):
(39Ar/37Ar)Ca = 0.0007 ± 0.000054
(36Ar/37Ar)Ca = 0.00028 ± 0.00017
(40Ar/39Ar)K = 0.003 ± 0.005
40Ar* = radiogenic argon
